# Supplementary material
Source: ML conference proceedings conference paper supplement (https://proceedings.neurips.cc/paper_files/paper/2017/hash/0768281a05da9f27df178b5c39a51263-Abstract.html)
Supplement: Supplementary file [file 0768281a05da9f27df178b5c39a51263-Supplemental.zip]

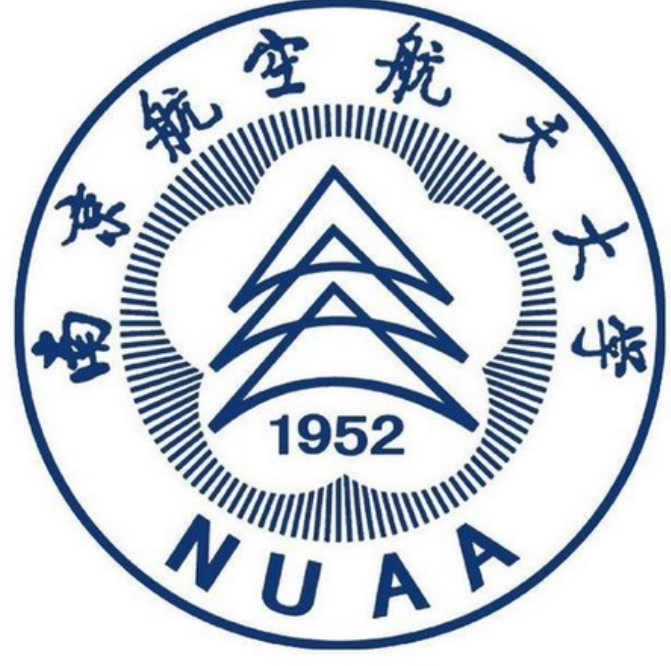

# Deep Hyperalignment

iBRAIN

Muhammad Yousefnezhad, Daoqiang Zhang

School of Computer Science and Technology, Nanjing University of Aeronautics and Astronautics, Nanjing, China

## MOTIVATION

★ A generalized approach for classical Hyperalignment (HA):

$$\min_{\mathbf{R}^{(i)}, \mathbf{R}^{(j)}} \sum_{i=1}^S \sum_{j=i+1}^S \left\| f(\mathbf{X}^{(i)}) \mathbf{R}^{(i)} - f(\mathbf{X}^{(j)}) \mathbf{R}^{(j)} \right\|_F^2$$

$$\text{s.t. } \left( \mathbf{R}^{(\ell)} \right)^\top \left( \left( f(\mathbf{X}^{(\ell)}) \right)^\top f(\mathbf{X}^{(\ell)}) + \epsilon \mathbf{I} \right) \mathbf{R}^{(\ell)} = \mathbf{I}, \quad \ell = 1:S$$

If  $f(\mathbf{x}) = \mathbf{x}$  &  $\epsilon = 0$ , then we have the original HA

If  $f(\mathbf{x}) = \mathbf{x}$  &  $\epsilon \neq 0$ , then we have the Regularized HA

If  $f(\mathbf{x})$  is a nonlinear kernel, then we have the Kernel HA

$\mathbf{X}^{(\ell)}$ : denotes brain activities  
 $\mathbf{R}^{(\ell)}$ : is DHA mapping

→ These methods are limited by a restricted fixed kernel function.

## METHOD

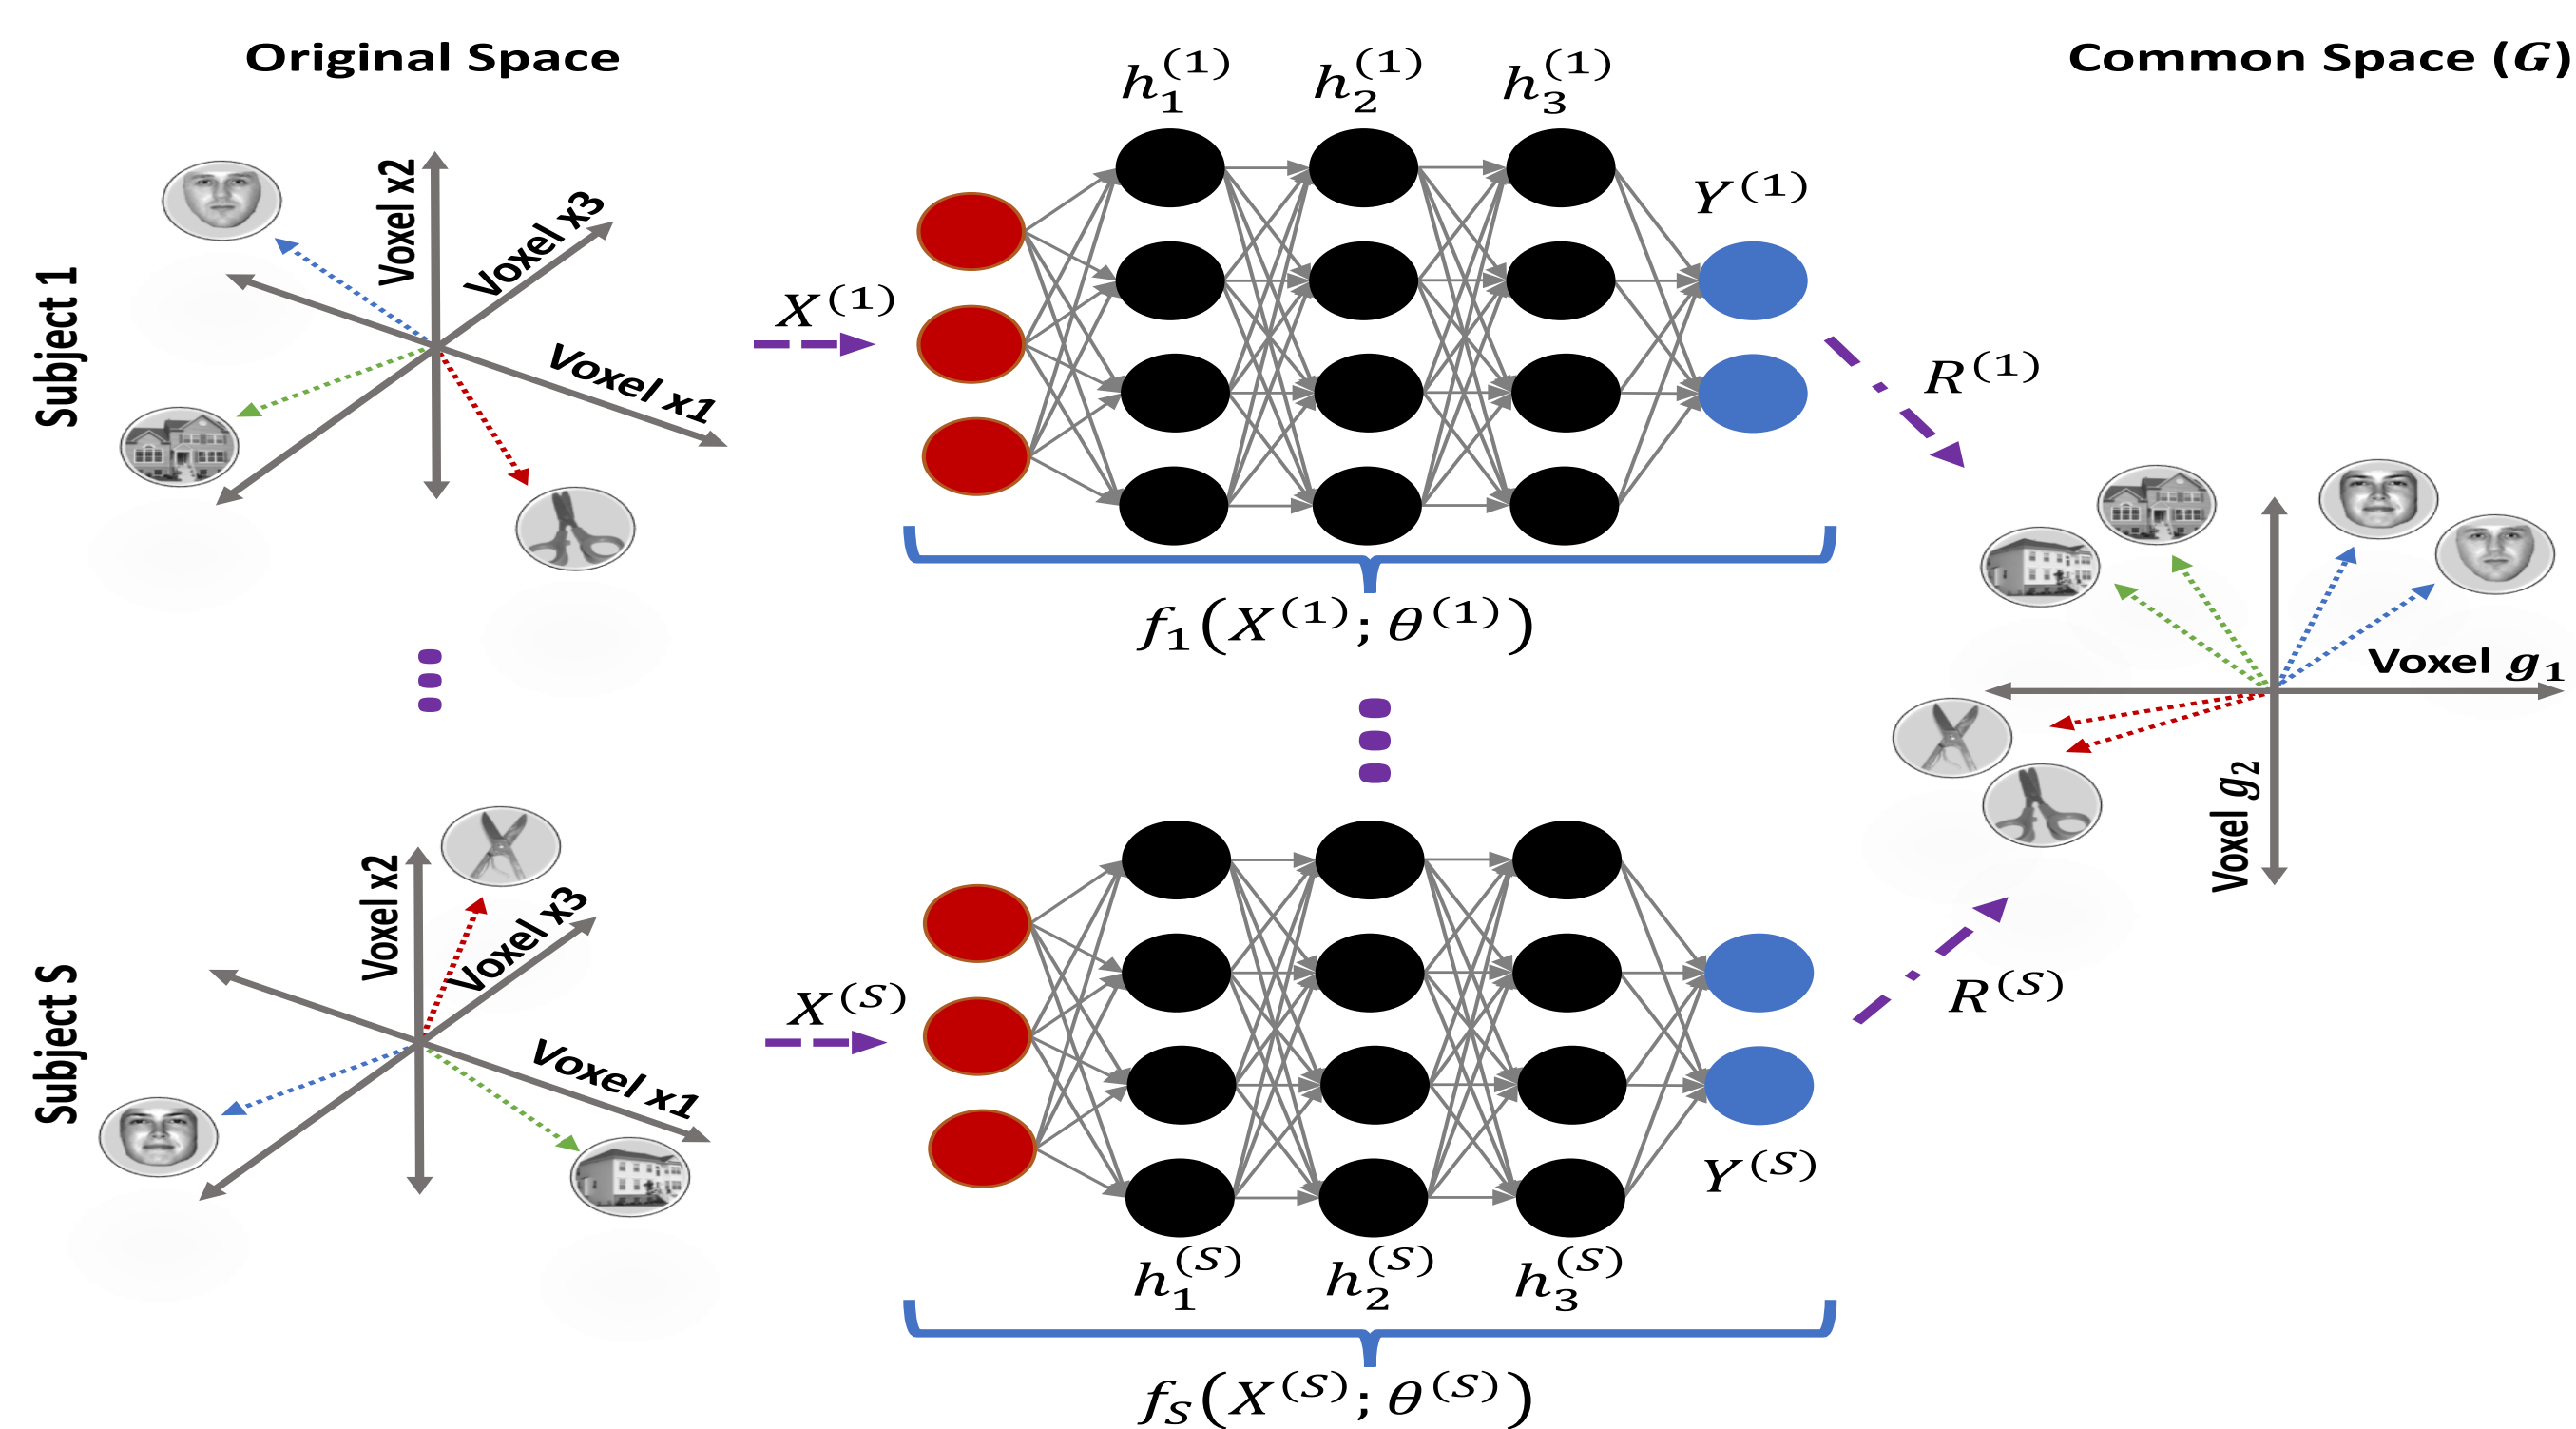

Graphical abstract of Deep Hyperalignment (DHA)

★ Objective Function:

$$\min_{\mathbf{G}, \mathbf{R}^{(i)}, \theta^{(i)}} \sum_{i=1}^S \left\| \mathbf{G} - f_i(\mathbf{X}^{(i)}; \theta^{(i)}) \mathbf{R}^{(i)} \right\|_F^2 \quad \text{s.t. } \mathbf{G}^\top \mathbf{G} = \mathbf{I}$$

$$\text{Shared Space: } \mathbf{G} = \frac{1}{S} \sum_{j=1}^S f_j(\mathbf{X}^{(j)}; \theta^{(j)}) \mathbf{R}^{(j)}$$

where Deep network is defined as follows:

$$f_\ell(\mathbf{X}^{(\ell)}; \theta^{(\ell)}) = \text{mat}(\mathbf{h}_C^{(\ell)}, T, V_{\text{new}})$$

$$\mathbf{h}_m^{(\ell)} = \mathbf{g}(\mathbf{W}_m^{(\ell)} \mathbf{h}_{m-1}^{(\ell)} + \mathbf{b}_m^{(\ell)}), \quad \text{where } \mathbf{h}_1^{(\ell)} = \text{vec}(\mathbf{X}^{(\ell)}) \quad \text{and} \quad m = 2:C$$

★ Optimization:

STEP 1: DHA shared space can be calculated as follows:

$$\min_{\mathbf{G}, \mathbf{R}^{(i)}, \theta^{(i)}} \sum_{i=1}^S \left\| \mathbf{G} - f_i(\mathbf{X}^{(i)}; \theta^{(i)}) \mathbf{R}^{(i)} \right\| \equiv \max_{\mathbf{G}} \left( \text{tr}(\mathbf{G}^\top \mathbf{A} \mathbf{G}) \right)$$

where A is sum of projection matrices:

$$\mathbf{P}^{(\ell)} = f_\ell(\mathbf{X}^{(\ell)}; \theta^{(\ell)}) \left( \left( f_\ell(\mathbf{X}^{(\ell)}; \theta^{(\ell)}) \right)^\top f_\ell(\mathbf{X}^{(\ell)}; \theta^{(\ell)}) + \epsilon \mathbf{I} \right)^{-1} \left( f_\ell(\mathbf{X}^{(\ell)}; \theta^{(\ell)}) \right)^\top, \quad \mathbf{A} = \sum_{i=1}^S \mathbf{P}^{(i)}$$

STEP 2: DHA mappings can be calculated as follows:

$$\mathbf{R}^{(\ell)} = \left( \left( f_\ell(\mathbf{X}^{(\ell)}; \theta^{(\ell)}) \right)^\top f_\ell(\mathbf{X}^{(\ell)}; \theta^{(\ell)}) + \epsilon \mathbf{I} \right)^{-1} \left( f_\ell(\mathbf{X}^{(\ell)}; \theta^{(\ell)}) \right)^\top \mathbf{G}.$$

STEP 3: Deep Network parameters can be iteratively calculated as follows by using SGD:

$$\theta^{(\ell)} \leftarrow \theta^{(\ell)} - \eta \nabla \theta^{(\ell)}, \quad \text{where } \mathbf{Z} = \sum_{\ell=1}^T \lambda_\ell \quad \text{and}$$

$$\frac{\partial \mathbf{Z}}{\partial f_\ell(\mathbf{X}^{(\ell)}; \theta^{(\ell)})} = 2\mathbf{R}^{(\ell)} \mathbf{G}^\top - 2\mathbf{R}^{(\ell)} \left( \mathbf{R}^{(\ell)} \right)^\top \left( f_\ell(\mathbf{X}^{(\ell)}; \theta^{(\ell)}) \right)^\top.$$

## DATASETS

★ This paper utilizes 7 datasets for running empirical studies:

| Title                       | ID    | S   | K  | T   | V    | X   | Y   | Z  | Scanner | TR  | TE |
|-----------------------------|-------|-----|----|-----|------|-----|-----|----|---------|-----|----|
| Mixed-gambles task          | DS005 | 48  | 2  | 240 | 450  | 53  | 63  | 52 | S 3T    | 2   | 30 |
| Visual Object Recognition   | DS105 | 71  | 8  | 121 | 1963 | 79  | 95  | 79 | G 3T    | 2.5 | 30 |
| Word and Object Processing  | DS107 | 98  | 4  | 164 | 932  | 53  | 63  | 52 | S 3T    | 2   | 28 |
| Auditory and Visual Oddball | DS116 | 102 | 2  | 170 | 2532 | 53  | 63  | 40 | P 3T    | 2   | 25 |
| Multi-subject, multi-modal  | DS117 | 171 | 2  | 210 | 524  | 64  | 61  | 33 | S 3T    | 2   | 30 |
| Forrest Gump                | DS113 | 20  | 10 | 451 | 2400 | 160 | 160 | 36 | S 7T    | 2.3 | 22 |
| Raiders of the Lost Ark     | N/A   | 10  | 7  | 924 | 980  | 78  | 78  | 54 | S 3T    | 3   | 30 |

S is the number of subject; K denotes the number of stimulus categories; T is the number of scans in unites of TRs (Time of Repetition); V denotes the number of voxels in ROI; X, Y, Z are the size of 3D images; Scanners include S=Siemens, G = General Electric, and P = Philips in 3 Tesla or 7 Tesla; TR is Time of Repetition in millisecond; TE denotes Echo Time in second; Please see [openfmri.org](http://openfmri.org) for more information.

## EXPERIMENTAL RESULTS

★ Simple Tasks Analysis:

Table 1: Accuracy of HA methods in post-alignment classification by using simple task datasets

| ↓Algorithms, Datasets→ | DS005             | DS105             | DS107             | DS116             | DS117             |
|------------------------|-------------------|-------------------|-------------------|-------------------|-------------------|
| $\nu$ -SVM [17]        | 71.65±0.97        | 22.89±1.02        | 38.84±0.82        | 67.26±1.99        | 73.32±1.67        |
| HA [1]                 | 81.27±0.59        | 30.03±0.87        | 43.01±0.56        | 74.23±1.40        | 77.93±0.29        |
| RHA [2]                | 83.06±0.36        | 32.62±0.52        | 46.82±0.37        | 78.71±0.76        | 84.22±0.44        |
| KHA [3]                | 85.29±0.49        | 37.14±0.91        | 52.69±0.69        | 78.03±0.89        | 83.32±0.41        |
| SVD-HA [4]             | 90.82±1.23        | 40.21±0.83        | 59.54±0.99        | 81.56±0.54        | 95.62±0.83        |
| SRM [5]                | 91.26±0.34        | 48.77±0.94        | 64.11±0.37        | 83.31±0.73        | 95.01±0.64        |
| SL [9]                 | 90.21±0.61        | 49.86±0.4         | 64.07±0.98        | 82.32±0.28        | 94.96±0.24        |
| CAE [6]                | 94.25±0.76        | 54.52±0.80        | 72.16±0.43        | <b>91.49±0.67</b> | 95.92±0.67        |
| DHA                    | <b>97.92±0.82</b> | <b>60.39±0.68</b> | <b>73.05±0.63</b> | 90.28±0.71        | <b>97.99±0.94</b> |

Table 2: Area under the ROC curve (AUC) of different HA methods in post-alignment classification by using simple task datasets

| ↓Algorithms, Datasets→ | DS005             | DS105             | DS107             | DS116             | DS117             |
|------------------------|-------------------|-------------------|-------------------|-------------------|-------------------|
| $\nu$ -SVM [17]        | 68.37±1.01        | 21.76±0.91        | 36.84±1.45        | 62.49±1.34        | 70.17±0.59        |
| HA [1]                 | 70.32±0.92        | 28.91±1.03        | 40.21±0.33        | 70.67±0.97        | 76.14±0.49        |
| RHA [2]                | 82.22±0.42        | 30.35±0.39        | 43.63±0.61        | 76.34±0.45        | 81.54±0.92        |
| KHA [3]                | 80.91±0.21        | 36.23±0.57        | 50.41±0.92        | 75.28±0.94        | 80.92±0.28        |
| SVD-HA [4]             | 88.54±0.71        | 37.61±0.62        | 57.54±0.31        | 78.66±0.82        | 92.14±0.42        |
| SRM [5]                | 90.23±0.74        | 44.48±0.75        | 62.41±0.72        | 79.20±0.98        | 93.65±0.93        |
| SL [9]                 | 89.79±0.25        | 47.32±0.92        | 61.84±0.32        | 80.63±0.81        | 93.26±0.72        |
| CAE [6]                | 91.24±0.61        | 52.16±0.63        | <b>72.33±0.79</b> | 87.53±0.72        | 91.49±0.33        |
| DHA                    | <b>96.91±0.82</b> | <b>59.57±0.32</b> | 70.23±0.92        | <b>89.93±0.24</b> | <b>96.13±0.32</b> |

★ Complex Tasks Analysis:

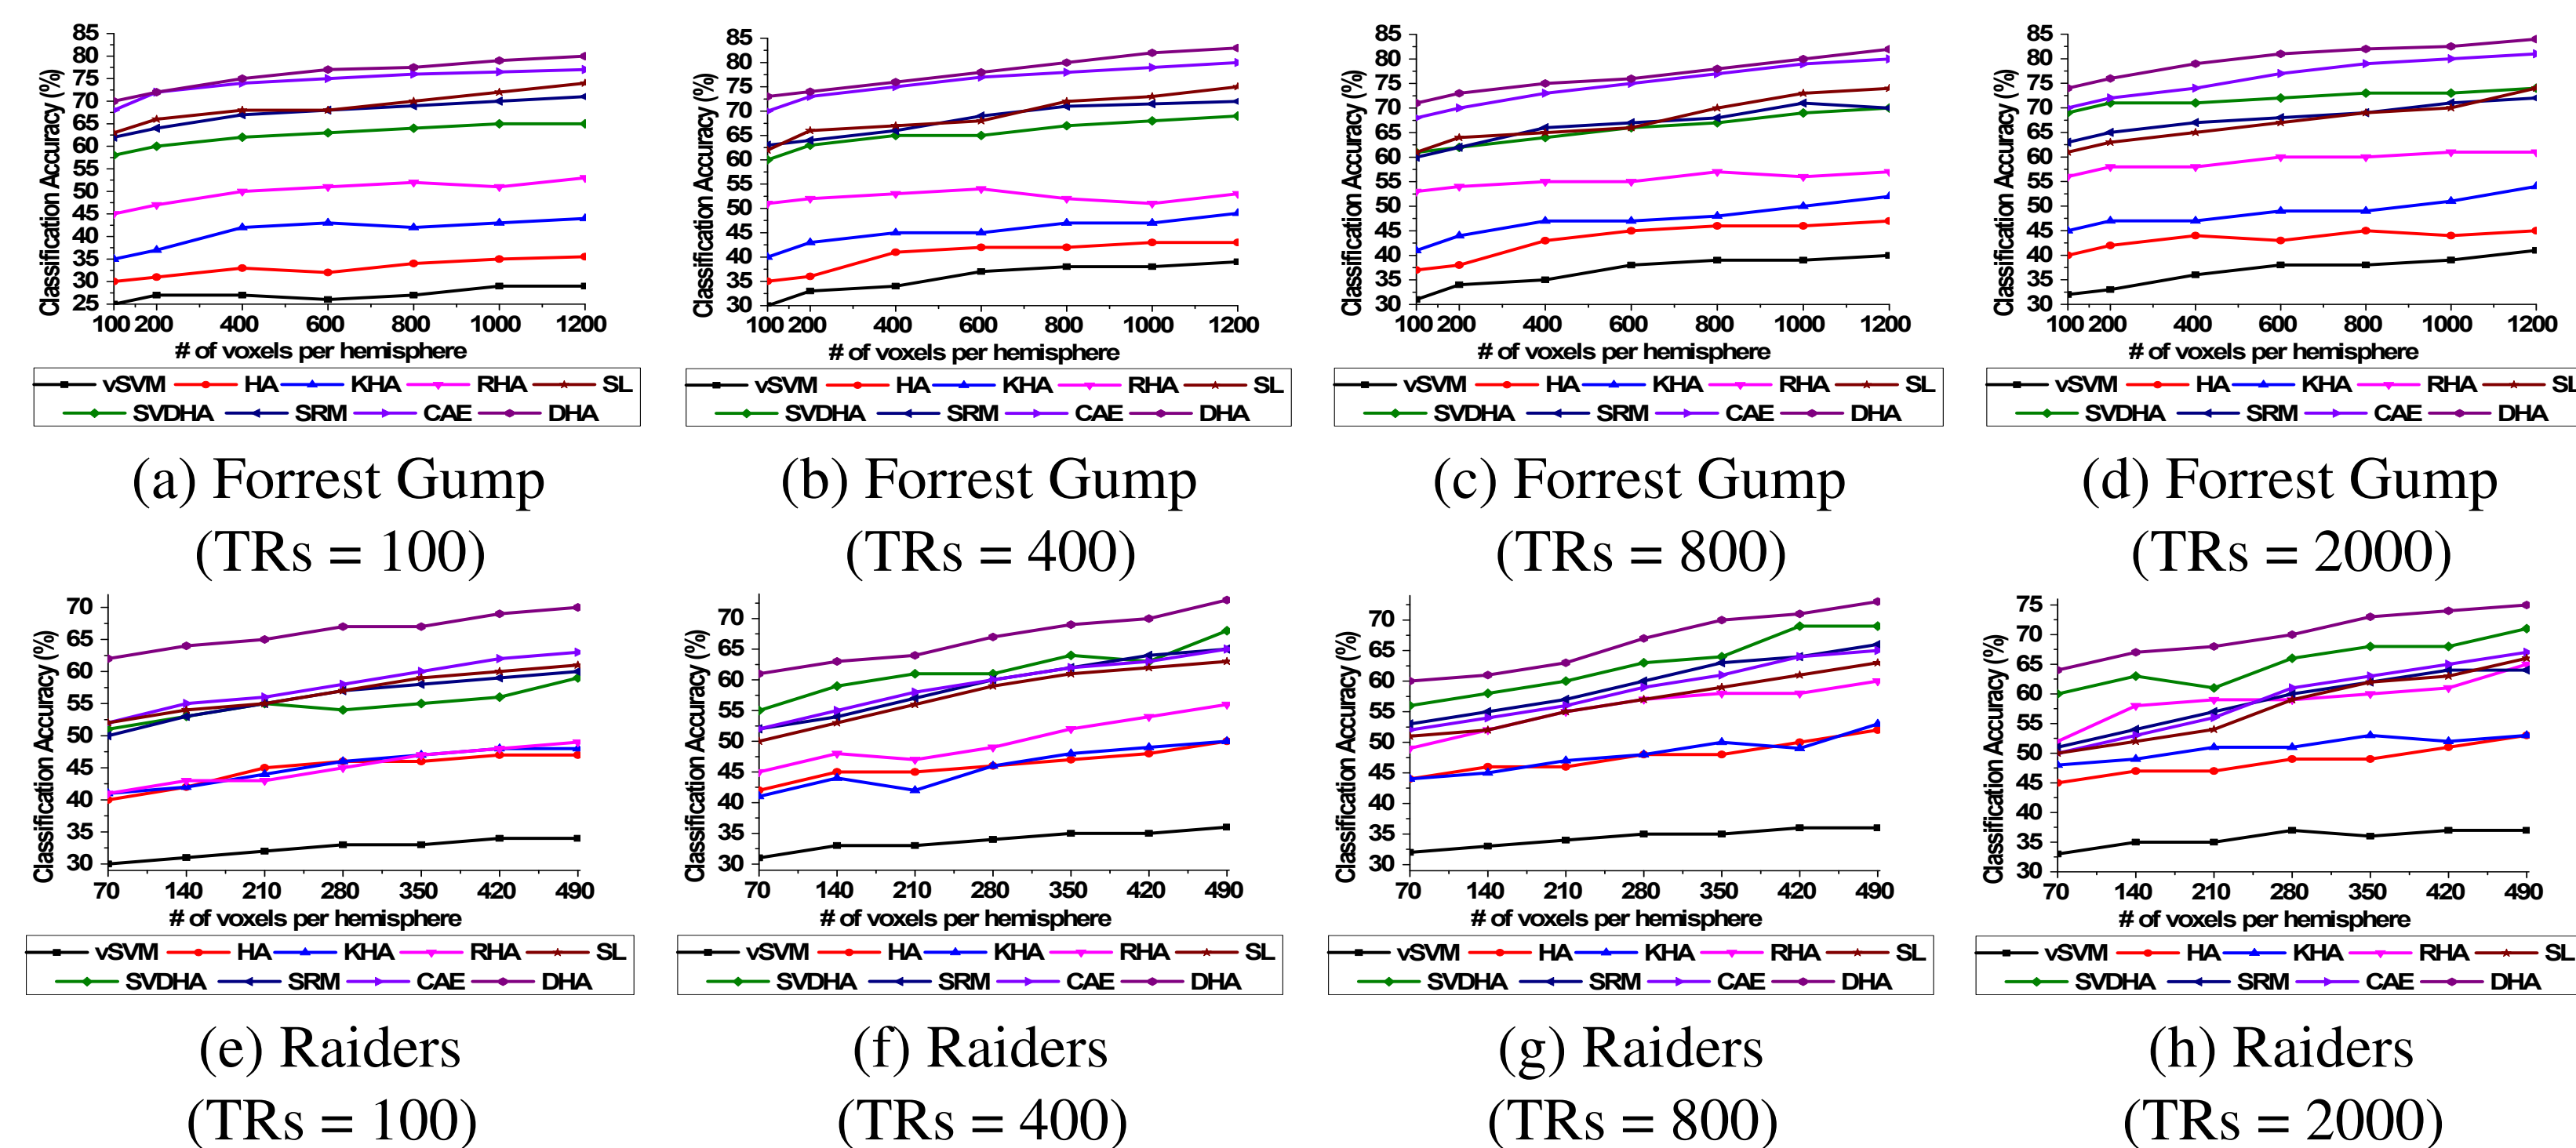

★ Runtime Analysis:

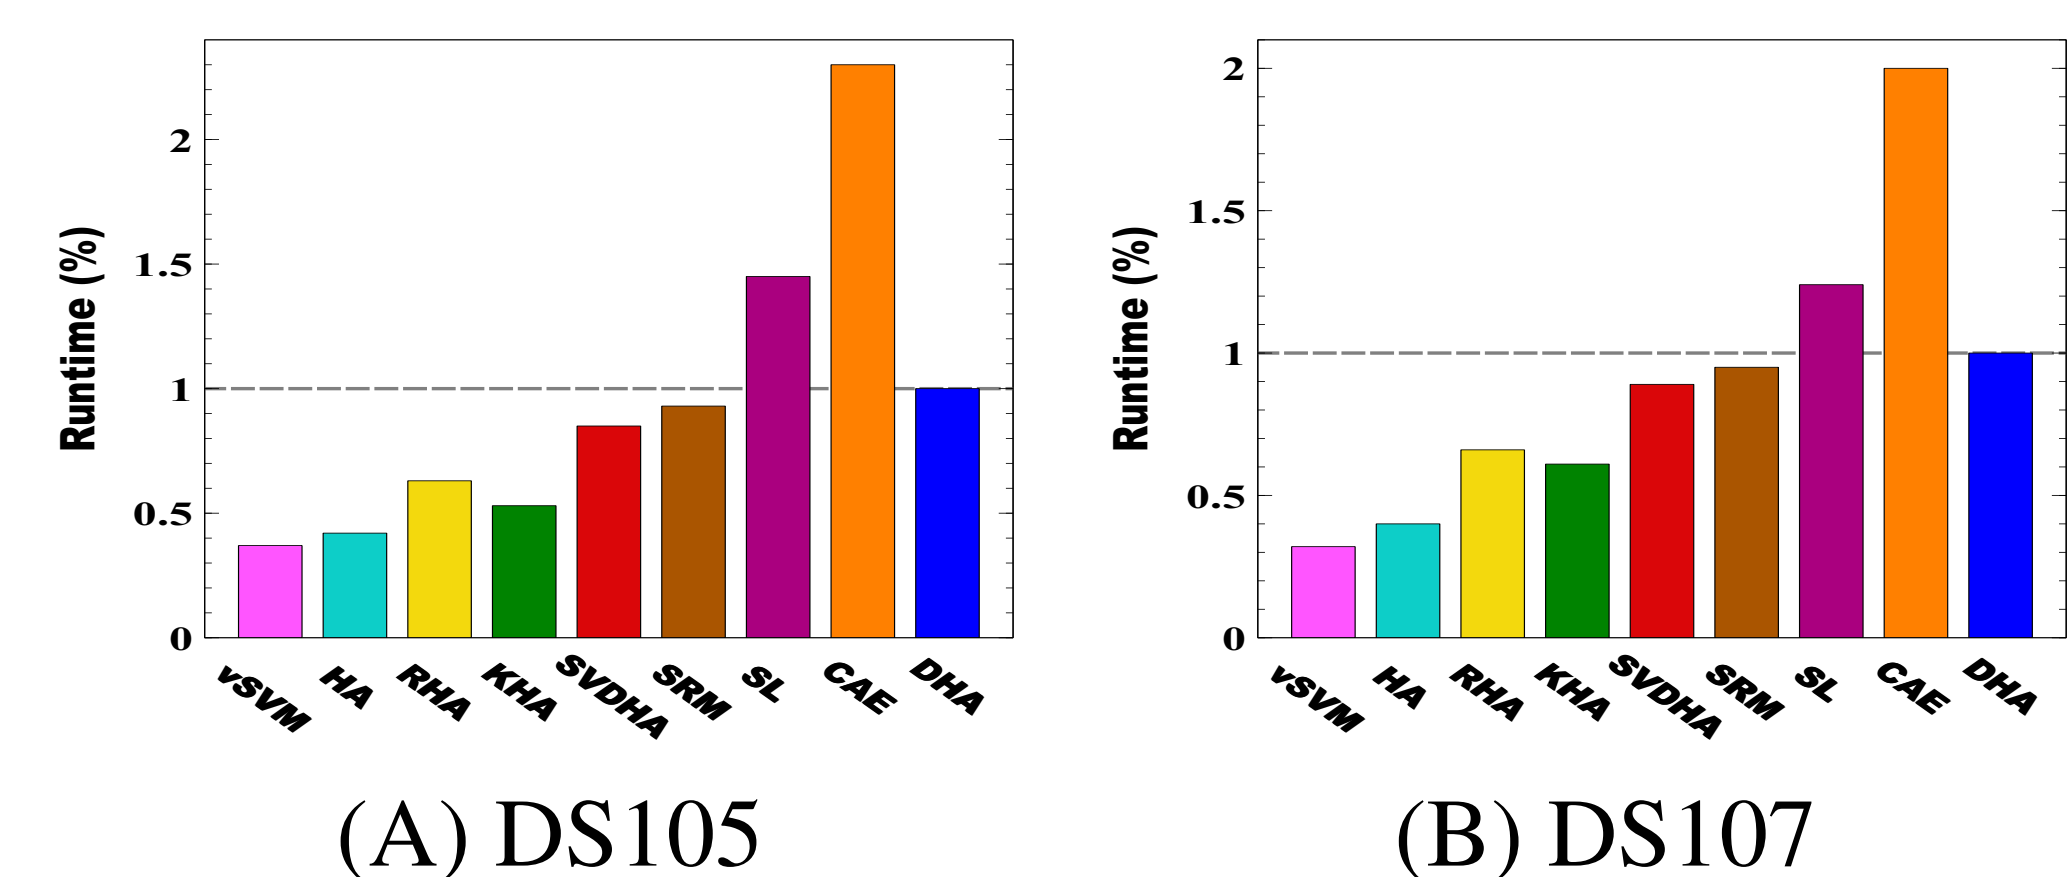

## CONCLUSION

This paper extended a deep approach for hyperalignment methods in order to provide accurate functional alignment in multi-subject fMRI analysis. Deep Hyperalignment (DHA) can handle fMRI datasets with nonlinearity, high-dimensionality (broad ROI), and a large number of subjects. DHA is parametric and uses rank- $\$m\$$  SVD and stochastic gradient descent for optimization. Experimental studies on multi-subject fMRI datasets confirm that the DHA method achieves superior performance to other state-of-the-art HA algorithms. In the future, we will plan to employ DHA for improving the performance of other techniques in fMRI analysis, e.g. Representational Similarity Analysis (RSA), multi-modality, and hub detection.
